# Supplementary material for: A novel porous interbody fusion cage modified by microarc oxidation and hydrothermal treatment technology accelerate osseointegration and spinal fusion in sheep
Source: Royal Society of Chemistry journal article supplement (doi:10.1039/d3ra08185k), 2024-01-01
Supplement: d3ra08185k2.pdf [file d3ra08185k2.pdf]

### Supplementary materials

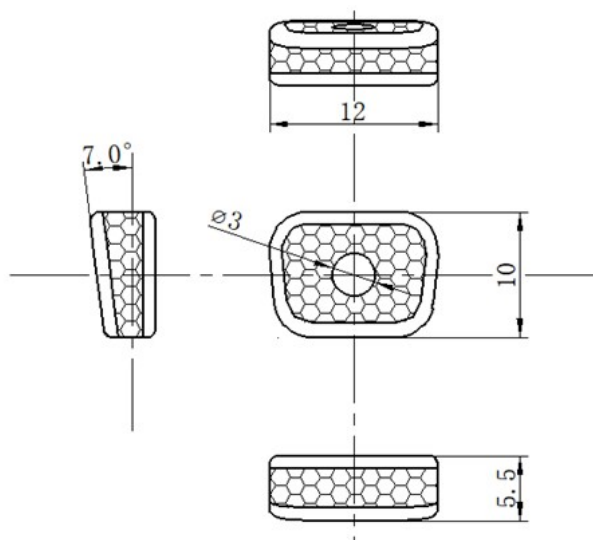

Supplementary Figure 1. Design diagram of experimental interbody fusion cage.

Supplementary Table 1. Water contact angle values of the samples.

| Control     | MAO        | MAO+HT      |
|-------------|------------|-------------|
| 99.90±0.44° | 21.04±0.39 | 19.75±0.80° |
